# Supplementary material for: Characteristics and Research Techniques Associated with the Journal Impact Factor and Other Key Metrics in Pharmacology Journals
Source: MDPI journal article supplement (doi:10.3390/computation9110116), 2021-11-05
Supplement: s1 [file s1]

# Characteristics and Research Techniques Associated with the Journal Impact Factor and Other Key Metrics in Pharmacology Journals

Mingkwan Na Takuathung <sup>1</sup>, Wannachai Sakuludomkan <sup>1</sup>, Supanimit Teekachunhatean <sup>1</sup> and Nut Koonrungsomboon <sup>1,2,\*</sup>

<sup>1</sup> Department of Pharmacology, Faculty of Medicine, Chiang Mai University, Chiang Mai 50200, Thailand; mingkwan.n@cmu.ac.th (M.N.T.); wannachai.yin@gmail.com (W.S.); supanimit.t@cmu.ac.th (S.T.)

<sup>2</sup> Musculoskeletal Science and Translational Research (MSTR) Center, Chiang Mai University, Chiang Mai 50200, Thailand

\* Correspondence: nut.koonrung@cmu.ac.th; Tel: +66-5393-5353

**Table S1.** Associations between study characteristics/research techniques and article influence score.

| Variables                                   | B      | 95% confidence interval | SE    | Beta   | <i>p</i> value |
|---------------------------------------------|--------|-------------------------|-------|--------|----------------|
| Use of a registry database                  | 0.163  | 0.097 to 0.230          | 0.034 | 0.199  | <0.001         |
| Omics techniques                            | 0.126  | 0.067 to 0.185          | 0.030 | 0.144  | <0.001         |
| Use of questionnaire                        | 0.110  | 0.057 to 0.163          | 0.027 | 0.168  | <0.001         |
| <i>In vivo</i> experiments on animals       | 0.079  | 0.041 to 0.118          | 0.020 | 0.174  | <0.001         |
| Interventions on human subjects             | 0.066  | 0.020 to 0.112          | 0.023 | 0.114  | 0.005          |
| Molecular techniques                        | 0.061  | 0.023 to 0.100          | 0.020 | 0.122  | 0.002          |
| Number of authors                           | 0.011  | 0.007 to 0.016          | 0.002 | 0.160  | <0.001         |
| <i>h</i> -index of the corresponding author | 0.002  | 0.001 to 0.004          | 0.001 | 0.145  | <0.001         |
| Country income level                        | -0.051 | -0.078 to -0.024        | 0.014 | -0.137 | <0.001         |
| <i>In vitro</i> experiments                 | -0.077 | -0.125 to -0.029        | 0.024 | -0.151 | 0.002          |

B, unstandardized beta (representing the slope of the line between the independent variable and the dependent variable); SE, standard error; Beta, standardized beta (representing the strength and direction of the relationship between the independent variable and the dependent variable).
